# Supplementary material
Source: PubMed Central journal article supplement (PMC4208976)

**SUPPLEMENTARY APPENDIX:****Details of Search Strategy**Ovid

Database(s): Embase 1988 to 2013 Week 28, Ovid MEDLINE(R) In-Process & Other Non-Indexed Citations and Ovid MEDLINE(R) 1946 to Present, EBM Reviews - Cochrane Central Register of Controlled Trials June 2013, EBM Reviews - Cochrane Database of Systematic Reviews 2005 to May 2013

## Search Strategy:

| #  | Searches                                                                                                                                                                                                                        | Results |
|----|---------------------------------------------------------------------------------------------------------------------------------------------------------------------------------------------------------------------------------|---------|
| 1  | Fatty Liver/                                                                                                                                                                                                                    | 34015   |
| 2  | exp nonalcoholic fatty liver/                                                                                                                                                                                                   | 10820   |
| 3  | ("fatty liver" or steatohepatitis or ((NAFLD or NASH) and (liver* or hepat*)) or steatohepatitides or (liver adj2 steatos*) or "visceral steatos*").mp. [mp=ti, ab, sh, hw, tn, ot, dm, mf, dv, kw, nm, kf, ps, rs, ui, tx, ct] | 53319   |
| 4  | 1 or 2 or 3                                                                                                                                                                                                                     | 53319   |
| 5  | Prognosis/                                                                                                                                                                                                                      | 732245  |
| 6  | disease course/                                                                                                                                                                                                                 | 275761  |
| 7  | disease progression/                                                                                                                                                                                                            | 383328  |
| 8  | exp treatment outcome/                                                                                                                                                                                                          | 1648861 |
| 9  | (outcome* or "natural history" or prognos* or progression or (disease adj3 course) or (disease adj3 evolution)).mp. [mp=ti, ab, sh, hw, tn, ot, dm, mf, dv, kw, nm, kf, ps, rs, ui, tx, ct]                                     | 4710658 |
| 10 | or/5-9                                                                                                                                                                                                                          | 4767844 |
| 11 | 4 and 10                                                                                                                                                                                                                        | 11780   |
| 12 | exp controlled study/                                                                                                                                                                                                           | 4168131 |
| 13 | exp randomized controlled trial/                                                                                                                                                                                                | 709672  |
| 14 | ((control\$ or randomized) adj2 (study or studies or trial or trials)).mp. [mp=ti, ab, sh, hw, tn, ot, dm, mf, dv, kw, nm, kf, ps, rs, ui, tx, ct]                                                                              | 5388418 |
| 15 | meta analysis/                                                                                                                                                                                                                  | 117927  |
| 16 | meta-analys\$.mp.                                                                                                                                                                                                               | 191750  |
| 17 | exp "systematic review"/                                                                                                                                                                                                        | 62017   |
| 18 | (systematic* adj review\$).mp.                                                                                                                                                                                                  | 149408  |
| 19 | exp Cohort Studies/                                                                                                                                                                                                             | 1579728 |

|    |                                                                                                                                                                                                                                                                                                                                                                                                                                                                                                                                 |         |
|----|---------------------------------------------------------------------------------------------------------------------------------------------------------------------------------------------------------------------------------------------------------------------------------------------------------------------------------------------------------------------------------------------------------------------------------------------------------------------------------------------------------------------------------|---------|
| 20 | exp prospective study/                                                                                                                                                                                                                                                                                                                                                                                                                                                                                                          | 656470  |
| 21 | (prospective adj (study or studies or survey or surveys or analysis or analyses or trial or trials)).mp.                                                                                                                                                                                                                                                                                                                                                                                                                        | 793561  |
| 22 | cohort*.mp.                                                                                                                                                                                                                                                                                                                                                                                                                                                                                                                     | 721146  |
| 23 | or/12-22                                                                                                                                                                                                                                                                                                                                                                                                                                                                                                                        | 7253882 |
| 24 | 11 and 23                                                                                                                                                                                                                                                                                                                                                                                                                                                                                                                       | 3821    |
| 25 | from 11 keep 7438-11600                                                                                                                                                                                                                                                                                                                                                                                                                                                                                                         | 4163    |
| 26 | limit 25 to (controlled clinical trial or meta analysis or randomized controlled trial or systematic reviews) [Limit not valid in Embase,CCTR,CDSR; records were retained]                                                                                                                                                                                                                                                                                                                                                      | 240     |
| 27 | 24 or 26                                                                                                                                                                                                                                                                                                                                                                                                                                                                                                                        | 3844    |
|    | limit 27 to (book or book series or editorial or erratum or letter or note or addresses or autobiography or bibliography or biography or comment or dictionary or directory or interactive tutorial or interview or lectures or legal cases or legislation or news or newspaper article or overall or patient education handout or periodical index or portraits or published erratum or video-audio media or webcasts) [Limit not valid in Embase,Ovid MEDLINE(R),Ovid MEDLINE(R) In-Process,CCTR,CDSR; records were retained] | 135     |
| 29 | 27 not 28                                                                                                                                                                                                                                                                                                                                                                                                                                                                                                                       | 3709    |
| 30 | from 11 keep 11601-11780                                                                                                                                                                                                                                                                                                                                                                                                                                                                                                        | 180     |
| 31 | 29 or 30                                                                                                                                                                                                                                                                                                                                                                                                                                                                                                                        | 3811    |
|    | limit 31 to ("all adult (19 plus years)" or "young adult (19 to 24 years)" or "adult (19 to 44 years)" or "young adult and adult (19-24 and 19-44)" or "middle age (45 to 64 years)" or "middle aged (45 plus years)" or "all aged (65 and over)" or "aged (80 and over)") [Limit not valid in Embase,CCTR,CDSR; records were retained]                                                                                                                                                                                         | 3492    |
| 33 | limit 32 to (adult <18 to 64 years> or aged <65+ years>) [Limit not valid in Ovid MEDLINE(R),Ovid MEDLINE(R) In-Process,CCTR,CDSR; records were retained]                                                                                                                                                                                                                                                                                                                                                                       | 2062    |
| 34 | limit 33 to yr="1985 -Current"                                                                                                                                                                                                                                                                                                                                                                                                                                                                                                  | 2052    |
| 35 | remove duplicates from 34                                                                                                                                                                                                                                                                                                                                                                                                                                                                                                       | 1469    |

**Scopus**

- 1 TITLE-ABS-KEY("fatty liver" or steatohepatitis or ((NAFLD or NASH) and (liver\* or hepat\*)) or steatohepatitides or (liver W/2 steatos\*) or "visceral steatos\*")
- 2 TITLE-ABS-KEY(outcome\* or "natural history" or prognos\* or progression or (disease W/3 course) or (disease W/3 evolution))
- 3 TITLE-ABS-KEY((meta W/1 analys\*) OR (systematic\* W/2 review\*) OR (control\* W/2 stud\*) OR (control\* W/2 trial\*) OR (randomized W/2 stud\*) OR (randomized W/2 trial\*) or cohort\* OR "prospective stud\*" OR "prospective survey\*" OR "prospective analys\*")
- 4 PUBYEAR Aft 1984
- 5 1 and 2 and 3 and 4
- 6 TITLE(child\* or adolescent\* or infant\*)
- 7 TITLE(adult or adults)
- 8 6 and not 7
- 9 5 and not 8
- 10 PMID(0\*) OR PMID(1\*) OR PMID(2\*) OR PMID(3\*) OR PMID(4\*) OR PMID(5\*) OR PMID(6\*) OR PMID(7\*) OR PMID(8\*) OR PMID(9\*)
- 11 9 and not 10
- 12 DOCTYPE(le) OR DOCTYPE(ed) OR DOCTYPE(bk) OR DOCTYPE(er) OR DOCTYPE(no) OR DOCTYPE(sh)
- 13 11 and not 12

**Web of Science**

- 1 Topic=("fatty liver" or steatohepatitis or ((NAFLD or NASH) and (liver\* or hepat\*)) or steatohepatitides or (liver NEAR/2 steatos\*) or "visceral steatos\*") AND Topic=(outcome\* or "natural history" or prognos\* or progression or (disease NEAR/3 course) or (disease NEAR/3 evolution)) AND Topic=((meta NEAR/1 analys\*) OR (systematic\* NEAR/2 review\*) OR (control\* NEAR/2 stud\*) OR (control\* NEAR/2 trial\*) OR (randomized NEAR/2 stud\*) OR (randomized NEAR/2 trial\*) or cohort\* OR "prospective stud\*" OR "prospective survey\*" OR "prospective analys\*") Timespan=1985-2013. Databases=SCI-EXPANDED.
- 2 TI=(child\* or adolescent\* or infant\*) NOT TI=(adult or adults)  
Databases=SCI-EXPANDED Timespan=1985-2013
- 3 (#1 not #2) AND Document Types=(Article OR Abstract of Published Item OR Meeting Abstract OR Proceedings Paper) Databases=SCI-EXPANDED Timespan=1985-2013

**Figure Legends:****Supplementary Figure 1.** Flowchart summarizing study identification and selection

ACCEPTED MANUSCRIPT

| Author, year of publication | Location       | Duration | Histologic staging system | Active treatment arm; No. of patients | Placebo arm intervention; No. of patients (total/no. with paired biopsies) | Change in fibrosis scores in placebo-treated patients |          |          |
|-----------------------------|----------------|----------|---------------------------|---------------------------------------|----------------------------------------------------------------------------|-------------------------------------------------------|----------|----------|
|                             |                |          |                           |                                       |                                                                            | Worsened                                              | Stable   | Improved |
| Abdelmalek, 2009            | MN and FL, USA | 12m      | Brunt                     | Betaine; 17                           | Placebo and Diet+Exercise counseling; 28/18                                | 7 (39%)                                               | 8 (44%)  | 3 (17%)  |
| Aithal, 2008                | Nottingham, UK | 12m      | Brunt                     | Pioglitazone; 31                      | Placebo and diet+exercise counseling; 37/30                                | 6 (20%)                                               | 18 (60%) | 6 (20%)  |
| Ratziu, 2008                | France         | 12m      | Brunt                     | Rosiglitazone; 32                     | Placebo and diet+exercise counseling; 31/31                                | 6 (19%)                                               | 20 (65%) | 5 (16%)  |
| Sanyal, 2010                | USA            | 24m      | NASH-CRN                  | Vitamin E or pioglitazone; 164        | Placebo and diet+exercise counseling; 83/72                                | 16 (22%)                                              | 34 (47%) | 22 (31%) |
| Van Wagner, 2011            | IL, USA        | 12m      | Brunt                     | Pentoxifylline ; 19                   | Placebo and diet+exercise counseling; 7/7                                  | 3 (43%)                                               | 4 (57%)  | 0        |

[Abbreviations: No.- number, NASH-CRN-Nonalcoholic steatohepatitis Clinical Research Network, NAFLD-nonalcoholic fatty liver disease]

**Supplementary Table 1.** Details of patients included in control arm of placebo-controlled randomized controlled trials of NAFLD therapy. Please note that all participants in these trials had NASH.

|                                                                                                       |                                    | Final fibrosis Stage |   |   |   |   | Total stages of fibrosis progressed | Person-years of follow-up |
|-------------------------------------------------------------------------------------------------------|------------------------------------|----------------------|---|---|---|---|-------------------------------------|---------------------------|
| <b>Non-Alcoholic Fatty Liver Disease (2 studies) – All patients had non-alcoholic steatohepatitis</b> |                                    |                      |   |   |   |   |                                     |                           |
|                                                                                                       |                                    | 0                    | 1 | 2 | 3 | 4 |                                     |                           |
| Baseline fibrosis stage                                                                               | 0 (8)                              | 6                    | 0 | 1 | 1 | 0 | +5                                  | 8                         |
|                                                                                                       | 1 (9)                              | 0                    | 5 | 1 | 2 | 1 | +8                                  | 9                         |
|                                                                                                       | 2 (4)                              | 0                    | 1 | 1 | 1 | 1 | +1                                  | 4                         |
|                                                                                                       | 3 (7)                              | 1                    | 1 | 0 | 5 | 0 | -5                                  | 8                         |
|                                                                                                       | 4 (0)                              | 0                    | 0 | 0 | 0 | 0 | 0                                   | 0                         |
|                                                                                                       | Overall (28)                       |                      |   |   |   |   | +9                                  | 28                        |
|                                                                                                       | Stage 0 plus Stage 1 fibrosis (17) |                      |   |   |   |   | +13                                 | 17                        |

**Supplementary Table 2.** Overall fibrosis progression rate by baseline fibrosis stage in patients with nonalcoholic steatohepatitis, enrolled in control arm of placebo-controlled randomized controlled trials.

| Study              | NAFLD                                                                                                                                                                                                                                         | NAFL                                                                                                                                                                                                                                                   | NASH                                                                                                                                                                                          |
|--------------------|-----------------------------------------------------------------------------------------------------------------------------------------------------------------------------------------------------------------------------------------------|--------------------------------------------------------------------------------------------------------------------------------------------------------------------------------------------------------------------------------------------------------|-----------------------------------------------------------------------------------------------------------------------------------------------------------------------------------------------|
| Adams 2005(6)      | (1) Steatosis involving at least 10% of hepatocytes on biopsy, (2) ethanol consumption of less than 140 g/week, (3) exclusion of patients with evidence of other liver disease using standard clinical, laboratory and histological criteria. | Combination of steatosis with non-specific inflammation (steatosis plus either lobular inflammation or Ballooning, but not both) or bland steatosis (steatosis without lobular inflammation, ballooning or fibrosis)                                   | Either the presence of steatosis plus mixed lobular inflammation plus hepatocellular ballooning, or the presence of steatosis plus any stage of fibrosis                                      |
| Argo 2009(21)      | Only patients with NASH                                                                                                                                                                                                                       | -                                                                                                                                                                                                                                                      | NASH characterized by fatty infiltration, inflammation, and variable degrees of fibrosis, Mallory hyaline, and apoptotic bodies                                                               |
| Ekstedt 2006(7)    | Hepatic steatosis without any other concomitant liver disease, weekly alcohol consumption <140g or medication associated with fatty infiltration of the liver                                                                                 | Simple steatosis or steatosis with non-specific inflammation and absence of fibrosis                                                                                                                                                                   | Steatosis plus any stage of fibrosis or as steatosis plus lobular inflammation plus ballooning degeneration                                                                                   |
| Evans 2002(22)     | Only patients with NASH                                                                                                                                                                                                                       | -                                                                                                                                                                                                                                                      | Non-alcoholic steatosis with necroinflammation and/or fibrosis                                                                                                                                |
| Fassio 2004(23)    | Only patients with NASH                                                                                                                                                                                                                       | -                                                                                                                                                                                                                                                      | Non-alcoholic macrovesicular steatosis (> 10% of hepatocytes) and lobular inflammation plus ballooning degeneration, Mallory hyaline fibrosis, sinusoidal fibrosis, or a combination thereof. |
| Hamaguchi 2010(24) | Hepatic steatosis in the absence of known causes of fatty liver                                                                                                                                                                               | Hepatic steatosis without presence of ballooned hepatocytes                                                                                                                                                                                            | Hepatic steatosis along with ballooned hepatocytes with lobular hepatitis                                                                                                                     |
| Hui 2005(25)       | Histological evidence of steatosis with or without the presence of necroinflammation and fibrosis, without known causes of fatty liver                                                                                                        | Simple steatosis without necroinflammation or fibrosis                                                                                                                                                                                                 | Hepatic steatosis with some necroinflammatory activity and/or fibrosis                                                                                                                        |
| Pais 2013(12)      | Hepatic steatosis >10% in the absence of known causes of fatty liver                                                                                                                                                                          | Hepatic steatosis alone (bland steatosis) or steatosis without evidence of ballooning, with spotty lobular inflammation of grade 1 maximum (<2 foci/sox power field) and no fibrosis or fibrosis limited to mild periportal or perisinusoidal fibrosis | Hepatic steatosis (>5%) co-existing with hepatocellular ballooning and lobular necroinflammation, with or without fibrosis                                                                    |
| Ratziu 2000(26)    | Abnormal liver enzymes in overweight or obese patients, after exclusion of other causes of liver diseases                                                                                                                                     | Not adequately reported                                                                                                                                                                                                                                | Not adequately reported                                                                                                                                                                       |
| Teli 1995(11)      | Hepatic steatosis in the absence of excessive alcohol use                                                                                                                                                                                     | Hepatic steatosis, with no features of steatohepatitis and fibrosis                                                                                                                                                                                    | -                                                                                                                                                                                             |
| Wong 2010(27)      | Histological evidence of steatosis with or without the presence of necroinflammation and fibrosis, without known causes of fatty liver                                                                                                        | Fatty liver alone without necroinflammation                                                                                                                                                                                                            | Hepatocyte ballooning or intralobular hepatocyte necrosis                                                                                                                                     |

[Abbreviations: NAFLD-nonalcoholic fatty liver disease, NAFL- nonalcoholic fatty liver, NASH- nonalcoholic steatohepatitis]

**Supplementary Table 3.** Definitions of NAFLD, NAFL and NASH in included studies

ACCEPTED MANUSCRIPT



| Question                                                                                 | Scoring scheme                                                                                                                                                                                                                                            | Adams(6) | Argo(21) | Ekstedt(7) | Evans(22)  | Fassio(23) | Hamaguchi(24) | Harrison (41) | Hui(25)    | Pais(12) | Ratziu(26) | Teli(11)   | Wong(27) | Abdelmalek(28) |
|------------------------------------------------------------------------------------------|-----------------------------------------------------------------------------------------------------------------------------------------------------------------------------------------------------------------------------------------------------------|----------|----------|------------|------------|------------|---------------|---------------|------------|----------|------------|------------|----------|----------------|
| Representative of the average adult in the community                                     | 1 point for unselected participants in population-based or multicenter studies, 0.5 points for unselected participants in single-center hospital-based study; 0 points for participants in an RCT or selective cohort                                     | 0.5      | 0.5      | 1          | 0.5        | 0.5        | 0.5           | 1             | 0.5        | 0.5      | 0          | 0.5        | 0.5      | 0              |
| Large cohort size                                                                        | 1 point if cohort size >50 patients with baseline and follow-up biopsies, 0.5 points if cohort size between 25-50 patients, 0 points if cohort size of <25 patients                                                                                       | 1        | 0        | 1          | 0          | 0.5        | 0.5           | 0             | 0          | 0.5      | 0          | 0          | 1        | 0              |
| Histological confirmation of NAFLD                                                       | 1 point if standardized assessment of NAFLD with information on NASH and/or NAFL separately, 0.5 points if standardized assessment of NAFLD, without distinction between NASH or NAFL, 0 points if reviewed only non-standardized classification of NAFLD | 0.5      | 1        | 1          | 1          | 1          | 1             | 1             | 1          | 1        | 0.5        | 0          | 1        | 1              |
| Histological assessment of fibrosis progression                                          | 1 point if assessed using Brunt classification or NASH-CRN, 0.5 point if assessed using Ishak or Metavir classification, 0 point if assessed using non-standardized classification                                                                        | 1        | 1        | 1          | 1          | 0.5        | 0.5           | 1             | 1          | 1        | 0.5        | 0          | 1        | 1              |
| Adequate follow-up of cohort for outcome to occur                                        | 1 point if mean follow-up of entire cohort >5 years, 0.5 points if cohort follow-up between 3-5 years, 0 points if mean follow-up of cohort <3 years                                                                                                      | 0.5      | 0.5      | 1          | 1          | 1          | 0             | 1             | 1          | 0.5      | 0.5        | 1          | 0.5      | 0              |
| Attrition rate                                                                           | 1 point if >80% of cohort followed-up, 0.5 points if 50-80% cohort followed-up, 0 points if >50% lost to follow-up or not reported how many patients with NAFLD seen in clinic                                                                            | 0        | 0.5      | 0.5        | 0          | 0          | 0             | 0             | 0          | 0        | 0          | 0          | 1        | 0.5            |
| Information on potential disease-modifying therapy adopted by participants               | 1 point if adequate information on lifestyle modification as well as medication use, 0.5 points if incomplete information, 0 points if no information on adoption of disease-modifying therapy                                                            | 0.5      | 1        | 0          | 0          | 1          | 1             | 0             | 0.5        | 0.5      | 0          | 0          | 1        | 1              |
| Reported risk factors associated with progression of fibrosis                            | 1 point if factors studied in multivariate models, 0.5 points if factors reported in only in univariate models, 0 points if factors associated with fibrosis progression not reported                                                                     | 1        | 0.5      | 1          | 0          | 1          | 1             | 0.5           | 0.5        | 1        | 0          | 0          | 1        | 0              |
| <b>Total Score (Maximum = 8; High quality ≥6; Medium quality 3-5 and low quality ≤2)</b> |                                                                                                                                                                                                                                                           | <b>5</b> | <b>5</b> | <b>6.5</b> | <b>3.5</b> | <b>5.5</b> | <b>4.5</b>    | <b>4.5</b>    | <b>4.5</b> | <b>5</b> | <b>1.5</b> | <b>1.5</b> | <b>7</b> | <b>3.5</b>     |

[Abbreviations: NAFLD-nonalcoholic fatty liver disease, NAFL- nonalcoholic fatty liver, NASH- nonalcoholic steatohepatitis]

**Supplementary Table 4.** Quality of included studies.

| Study                                         |                        |         | Final fibrosis stage |    |    |    |    | Fibrosis progression | PY FU |
|-----------------------------------------------|------------------------|---------|----------------------|----|----|----|----|----------------------|-------|
|                                               |                        |         | F0                   | F1 | F2 | F3 | F4 |                      |       |
| Adams(6)                                      | Initial fibrosis stage | F0 (25) | 13                   | 5  | 3  | 2  | 2  | +25                  | 80    |
|                                               |                        | F1 (21) | 7                    | 2  | 8  | 4  | 0  | +9                   | 67.2  |
|                                               |                        | F2 (23) | 4                    | 4  | 5  | 7  | 3  | +1                   | 73.6  |
|                                               |                        | F3 (18) | 2                    | 1  | 6  | 5  | 4  | -10                  | 57.6  |
|                                               |                        | F4 (16) | 0                    | 0  | 1  | 5  | 10 | -7                   | 51.2  |
|                                               | Overall                |         |                      |    |    |    |    | +18                  | 329.6 |
|                                               |                        |         | Final fibrosis stage |    |    |    |    |                      |       |
| Argo(21)                                      | Initial fibrosis stage | F0 (0)  | 0                    | 0  | 0  | 0  | 0  | 0                    | 0     |
|                                               |                        | F1 (1)  | 0                    | 0  | 1  | 0  | 0  | +1                   | 4.4   |
|                                               |                        | F2 (2)  | 1                    | 1  | 0  | 0  | 0  | -3                   | 8.8   |
|                                               |                        | F3 (2)  | 0                    | 0  | 0  | 0  | 2  | +2                   | 4.4   |
|                                               |                        | F4 (0)  | 0                    | 0  | 0  | 0  | 0  | 0                    | 0     |
|                                               | Overall                |         |                      |    |    |    |    | 0                    | 22    |
|                                               |                        |         | Final fibrosis stage |    |    |    |    |                      |       |
| Ekstedt(7)                                    | Initial fibrosis stage | F0 (36) | 19                   | 8  | 6  | 3  | 0  | +29                  | 496.8 |
|                                               |                        | F1 (19) | 5                    | 9  | 3  | 1  | 1  | +3                   | 262.2 |
|                                               |                        | F2 (11) | 0                    | 5  | 1  | 2  | 3  | +3                   | 151.8 |
|                                               |                        | F3 (4)  | 0                    | 0  | 1  | 1  | 2  | +1                   | 55.2  |
|                                               |                        | F4 (0)  | 0                    | 0  | 0  | 0  | 0  | 0                    | 0     |
|                                               | Overall                |         |                      |    |    |    |    | +36                  | 1202  |
|                                               |                        |         | Final fibrosis stage |    |    |    |    |                      |       |
| Evans(22)                                     | Initial fibrosis stage | F0 (4)  | 2                    | 1  | 1  | 0  | 0  | +3                   | 32.8  |
|                                               |                        | F1 (1)  | 0                    | 0  | 1  | 0  | 0  | +1                   | 8.2   |
|                                               |                        | F2 (2)  | 0                    | 0  | 1  | 1  | 0  | +1                   | 16.4  |
|                                               |                        | F3 (0)  | 0                    | 0  | 0  | 0  | 0  | 0                    | 0     |
|                                               |                        | F4 (0)  | 0                    | 0  | 0  | 0  | 0  | 0                    | 0     |
|                                               | Overall                |         |                      |    |    |    |    | +5                   | 57.2  |
|                                               |                        |         | Final fibrosis stage |    |    |    |    |                      |       |
| Fassio(23)<br>(Ishak staging)                 | Initial fibrosis stage | F0 (3)  | 2                    | 0  | 0  | 0  | 1  | +4                   | 15.9  |
|                                               |                        | F1 (11) | 0                    | 8  | 0  | 3  | 0  | +6                   | 58.3  |
|                                               |                        | F2 (4)  | 0                    | 2  | 1  | 1  | 0  | -1                   | 21.2  |
|                                               |                        | F3 (4)  | 0                    | 2  | 0  | 0  | 2  | -2                   | 21.2  |
|                                               |                        | F4 (0)  | 0                    | 0  | 0  | 0  | 0  | 0                    | 0     |
|                                               | Overall                |         |                      |    |    |    |    | +7                   | 116.6 |
|                                               |                        |         | Final fibrosis stage |    |    |    |    |                      |       |
| Hamaguchi<br>(24)(some reported as 1.5 stage) | Initial fibrosis stage | F0 (0)  | 0                    | 0  | 0  | 0  | 0  | 0                    | 0     |
|                                               |                        | F1 (24) | 3                    | 10 | 10 | 1  | 0  | +10                  | 57.6  |
|                                               |                        | F2 (6)  | 0                    | 4  | 2  | 0  | 0  | -4                   | 14.4  |
|                                               |                        | F3 (5)  | 0                    | 2  | 2  | 1  | 0  | -6                   | 12    |
|                                               |                        | F4 (4)  | 0                    | 0  | 0  | 1  | 3  | -1                   | 9.6   |
|                                               | Overall                |         |                      |    |    |    |    | -1                   | 93.6  |
|                                               |                        |         | Final fibrosis stage |    |    |    |    |                      |       |
| Hui(25)                                       | Initial                | F0 (11) | 5                    | 5  | 1  | 0  | 0  | +7                   | 67.1  |

|            |                        |                      |    |    |    |    |             |                                           |       |
|------------|------------------------|----------------------|----|----|----|----|-------------|-------------------------------------------|-------|
|            | fibrosis stage         | F1 (5)               | 0  | 3  | 2  | 0  | 0           | +2                                        | 30.5  |
|            |                        | F2 (1)               | 0  | 0  | 0  | 0  | 1           | +2                                        | 6.1   |
|            |                        | F3 (0)               | 0  | 0  | 0  | 0  | 0           | 0                                         | 0     |
|            |                        | F4 (0)               | 0  | 0  | 0  | 0  | 0           | 0                                         | 0     |
|            | Overall                |                      |    |    |    |    |             | +11                                       | 97.8  |
|            |                        | Final fibrosis stage |    |    |    |    |             |                                           |       |
| Pais(12)   |                        | F0                   | F1 | F2 | F3 | F4 |             |                                           |       |
|            | Initial fibrosis stage | F0 (10)              | 6  | 3  | 1  | 0  | +7 (approx) | 37                                        |       |
|            |                        | F1 (10)              | 0  | 1  | 5  | 4  | +13         | 37                                        |       |
|            |                        | F2 (5)               | 0  | 0  | 4  | 1  | +1          | 18.5                                      |       |
|            |                        | F3 (0)               | 0  | 0  | 0  | 0  | 0           | 0                                         |       |
|            | F4 (0)                 | 0                    | 0  | 0  | 0  | 0  | 0           |                                           |       |
|            | Overall                |                      |    |    |    |    |             | +21                                       | 102.7 |
|            |                        | Final fibrosis stage |    |    |    |    |             |                                           |       |
| Ratziu(26) |                        | F0                   | F1 | F2 | F3 | F4 |             |                                           |       |
|            | Initial fibrosis stage | F0 (4)               | 4  | 0  | 0  | 0  | 0           | 20.8 (mean FU 5.2 inferred from total py) |       |
|            |                        | F1 (10)              | 4  | 4  | 1  | 0  | 1           | 52                                        |       |
|            |                        | F2 (0)               | 0  | 0  | 0  | 0  | 0           | 0                                         |       |
|            |                        | F3 (0)               | 0  | 0  | 0  | 0  | 0           | 0                                         |       |
|            | F4 (0)                 | 0                    | 0  | 0  | 0  | 0  | 0           |                                           |       |
|            | Overall                |                      |    |    |    |    |             | 0                                         | 73    |
|            |                        | Final fibrosis stage |    |    |    |    |             |                                           |       |
| Teli(11)   |                        | F0                   | F1 | F2 | F3 | F4 |             |                                           |       |
|            | Initial fibrosis stage | F0 (12)              | 11 | 0  | 1  | 0  | 0           | +2                                        | 139.2 |
|            |                        | F1 (0)               | 0  | 0  | 0  | 0  | 0           | 0                                         | 0     |
|            |                        | F2 (0)               | 0  | 0  | 0  | 0  | 0           | 0                                         | 0     |
|            |                        | F3 (0)               | 0  | 0  | 0  | 0  | 0           | 0                                         | 0     |
|            | F4 (0)                 | 0                    | 0  | 0  | 0  | 0  | 0           | 0                                         |       |
|            | Overall                |                      |    |    |    |    |             | +2                                        | 139.2 |
|            |                        | Final fibrosis stage |    |    |    |    |             |                                           |       |
| Wong(27)   |                        | F0                   | F1 | F2 | F3 | F4 |             |                                           |       |
|            | Initial fibrosis stage | F0 (26)              | 17 | 7  | 0  | 1  | 1           | +14                                       | 78    |
|            |                        | F1 (17)              | 7  | 7  | 1  | 2  | 0           | -2                                        | 51    |
|            |                        | F2 (7)               | 4  | 1  | 0  | 1  | 1           | -6                                        | 21    |
|            |                        | F3 (1)               | 0  | 0  | 1  | 0  | 0           | -1                                        | 3     |
|            | F4 (1)                 | 0                    | 0  | 0  | 0  | 1  | 0           | 3                                         |       |
|            | Overall                |                      |    |    |    |    |             | +5                                        | 156   |

Supplementary Table 5. Fibrosis progression in individual studies

| Location            | Baseline fibrosis stage | NAFLD             | NAFL              | NASH              |
|---------------------|-------------------------|-------------------|-------------------|-------------------|
| Western (8 studies) | Stage 0                 | 0.12 (0.06-0.18)  | 0.05 (0.00-0.10)  | 0.14 (0.00-0.29)  |
|                     | Stage 1                 | 0.13 (0.04-0.23)  | 0.35 (0.20-0.50)  | 0.06 (-0.02-0.14) |
|                     | Stage 0 or 1            | 0.12 (0.06-0.17)  | 0.09 (0.02-0.15)  | 0.08 (-0.01-0.17) |
| Asian (3 studies)   | Stage 0                 | 0.14 (0.07-0.21)  | 0.11 (0.01-0.22)  | 0.17 (0.03-0.31)  |
|                     | Stage 1                 | 0.06 (-0.06-0.18) | 0.06 (-0.19-0.32) | 0.33 (-0.04-0.71) |
|                     | Stage 0 or 1            | 0.10 (0.07-0.14)  | 0.09 (0.04-0.14)  | 0.14 (0.07-0.21)  |

[Abbreviations: NAFLD-nonalcoholic fatty liver disease, NAFL- nonalcoholic fatty liver, NASH-nonalcoholic steatohepatitis]

**Supplementary Table 6.** Subgroup analysis comparing rates of fibrosis progression in Western and Asian population

| Study                           | Adams <sup>a</sup> (6) |               | Ekstedt(7)   |              | Fassio(23)    |               | Hamaguchi <sup>a</sup> (24) |              | Harrison <sup>b</sup> (36) |             | Hui(25)      |              | Wong(27)     |              |
|---------------------------------|------------------------|---------------|--------------|--------------|---------------|---------------|-----------------------------|--------------|----------------------------|-------------|--------------|--------------|--------------|--------------|
|                                 | PR (38)                | Non-PR (35)   | PR (29)      | Non-PR (41)  | PR (7)        | Non-PR (15)   | PR (11)                     | Non-PR (16)  | PR (7)                     | Non-PR (15) | PR (9)       | Non-PR (8)   | PR (14)      | Non-PR (38)  |
| <b>Age (mean±SD)</b>            | 44±2                   | 47±2          | 61±11        | 60±11        | 49±12         | 44±11         | 51±9                        | 48±15        | 49                         | 51          | 46±8         | 36±7         | 45±10        | 44±9         |
| <b>Male sex (n)</b>             | 13                     | 16            | 21           | 29           | 2             | 7             | 5                           | 12           | 6                          | 7           | 5            | 6            | 9            | 25           |
| <b>Diabetes (n)</b>             | 20                     | 15            | 15           | 24           | 4             | 4             | 7                           | 11           | 3                          | 6           | 2            | 2            | 6            | 20           |
| <b>Hypertension (n)</b>         | 12                     | 10            | 28           | 38           |               |               | 4                           | 3            | 6                          | 5           | 0            | 0            | 9            | 17           |
| <b>Obesity (n), or mean±SD</b>  | 28                     | 22            | 29.6<br>±3.3 | 28.3<br>±5.3 | 6             | 4*            | 30.9<br>±3.6                | 27.5<br>±2.5 | 31.8                       | 34.7        | 29.8<br>±2.9 | 27.2<br>±3.7 | 27.7<br>±4.4 | 27.3<br>±3.4 |
| <b>Metabolic syndrome (n)</b>   | 19                     | 20            | 18           | 21           | -             | -             | 3                           | 7*           | -                          | -           | -            | -            | 8            | 27           |
| <b>AST (mean±SD)</b>            | 71±34                  | 74±44         | 42±17        | 31±13*       | -             | -             | 32<br>±17                   | 29<br>±18    | 76                         | 40*         | -            | -            | -            | -            |
| <b>ALT (mean±SD)</b>            | 104±60                 | 94±51         | 75±44        | 51±25        | 70±10         | 73±22         | 40<br>±38                   | 48<br>±14    | 95                         | 64          | 128<br>±41   | 90<br>±35    | 51±15        | 63±16        |
| <b>AST/ALT ratio (mean±SD)</b>  | 0.8±0.3                | 0.9±0.4       | 0.6±0.2      | 0.7±0.4      | 0.53<br>±0.12 | 0.59<br>±0.14 | -                           | -            | 0.73                       | 0.76        | -            | -            | -            | -            |
| <b>Ferritin (mean±SD)</b>       | 354<br>±381            | 258<br>±194   | 207<br>±193  | 174<br>±125  | -             | -             | 46<br>±84                   | 397<br>±103  | -                          | -           | -            | -            | -            | -            |
| <b>HOMA-IR (mean±SD)</b>        | 2.78<br>±1.71          | 4.15<br>±3.78 | 5.2<br>±5.3  | 2.9<br>±1.5* | -             | -             | 3.9<br>±2.4                 | 3.4<br>±1.4  | -                          | -           | -            | -            | 1.7<br>±0.5  | 2.1<br>±0.5  |
| <b>Platelet count (mean±SD)</b> | 228<br>±85             | 197<br>±72    | 205<br>±59   | 252<br>±62*  | -             | -             | 243<br>±52                  | 230<br>±80   | -                          | -           | -            | -            | -            | -            |

\*-p<0.05 between progressors v. non-progressors; <sup>a</sup>compares progressors to stable repeat biopsy, <sup>b</sup>study offers p-value for difference between groups; please note for some studies, instead of standard deviation, range was reported – this was converted to standard deviation using the formula, S.D.=(max-min)/4 (derived from Hozo SP, Djulbegovic B, Hozo I. Estimating the mean and variance from the median, range, and the size of a sample. BMC Med Res Methodol. 2005;5:13) [Abbreviations: ALT-alanine aminotransferase, AST-aspartate aminotransferase, BMI-body mass index, CI-confidence intervals, HOMA-IR-homeostatic model assessment for insulin resistance, non-PR-patients with no progression of fibrosis, PR-patients with progressive fibrosis, SD-standard deviation]

**Supplementary Table 7.** Comparison between patients with progressive and non-progressive fibrosis

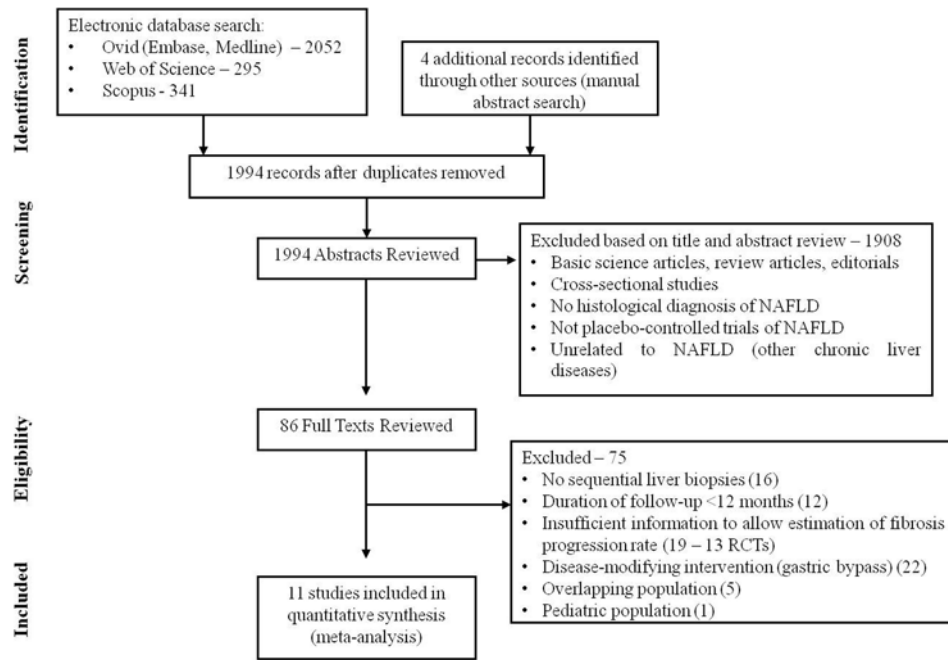

Supplement: NIHMS604814-supplement-01.pdf [file NIHMS604814-supplement-01.pdf]
